# Supplementary material for: Comparative proteomic analysis reveals that the Heterosis of two maize hybrids is related to enhancement of stress response and photosynthesis respectively
Source: PubMed Central journal article supplement (PMC7796551; doi:10.1186/s12870-020-02806-5), 2021-01-09

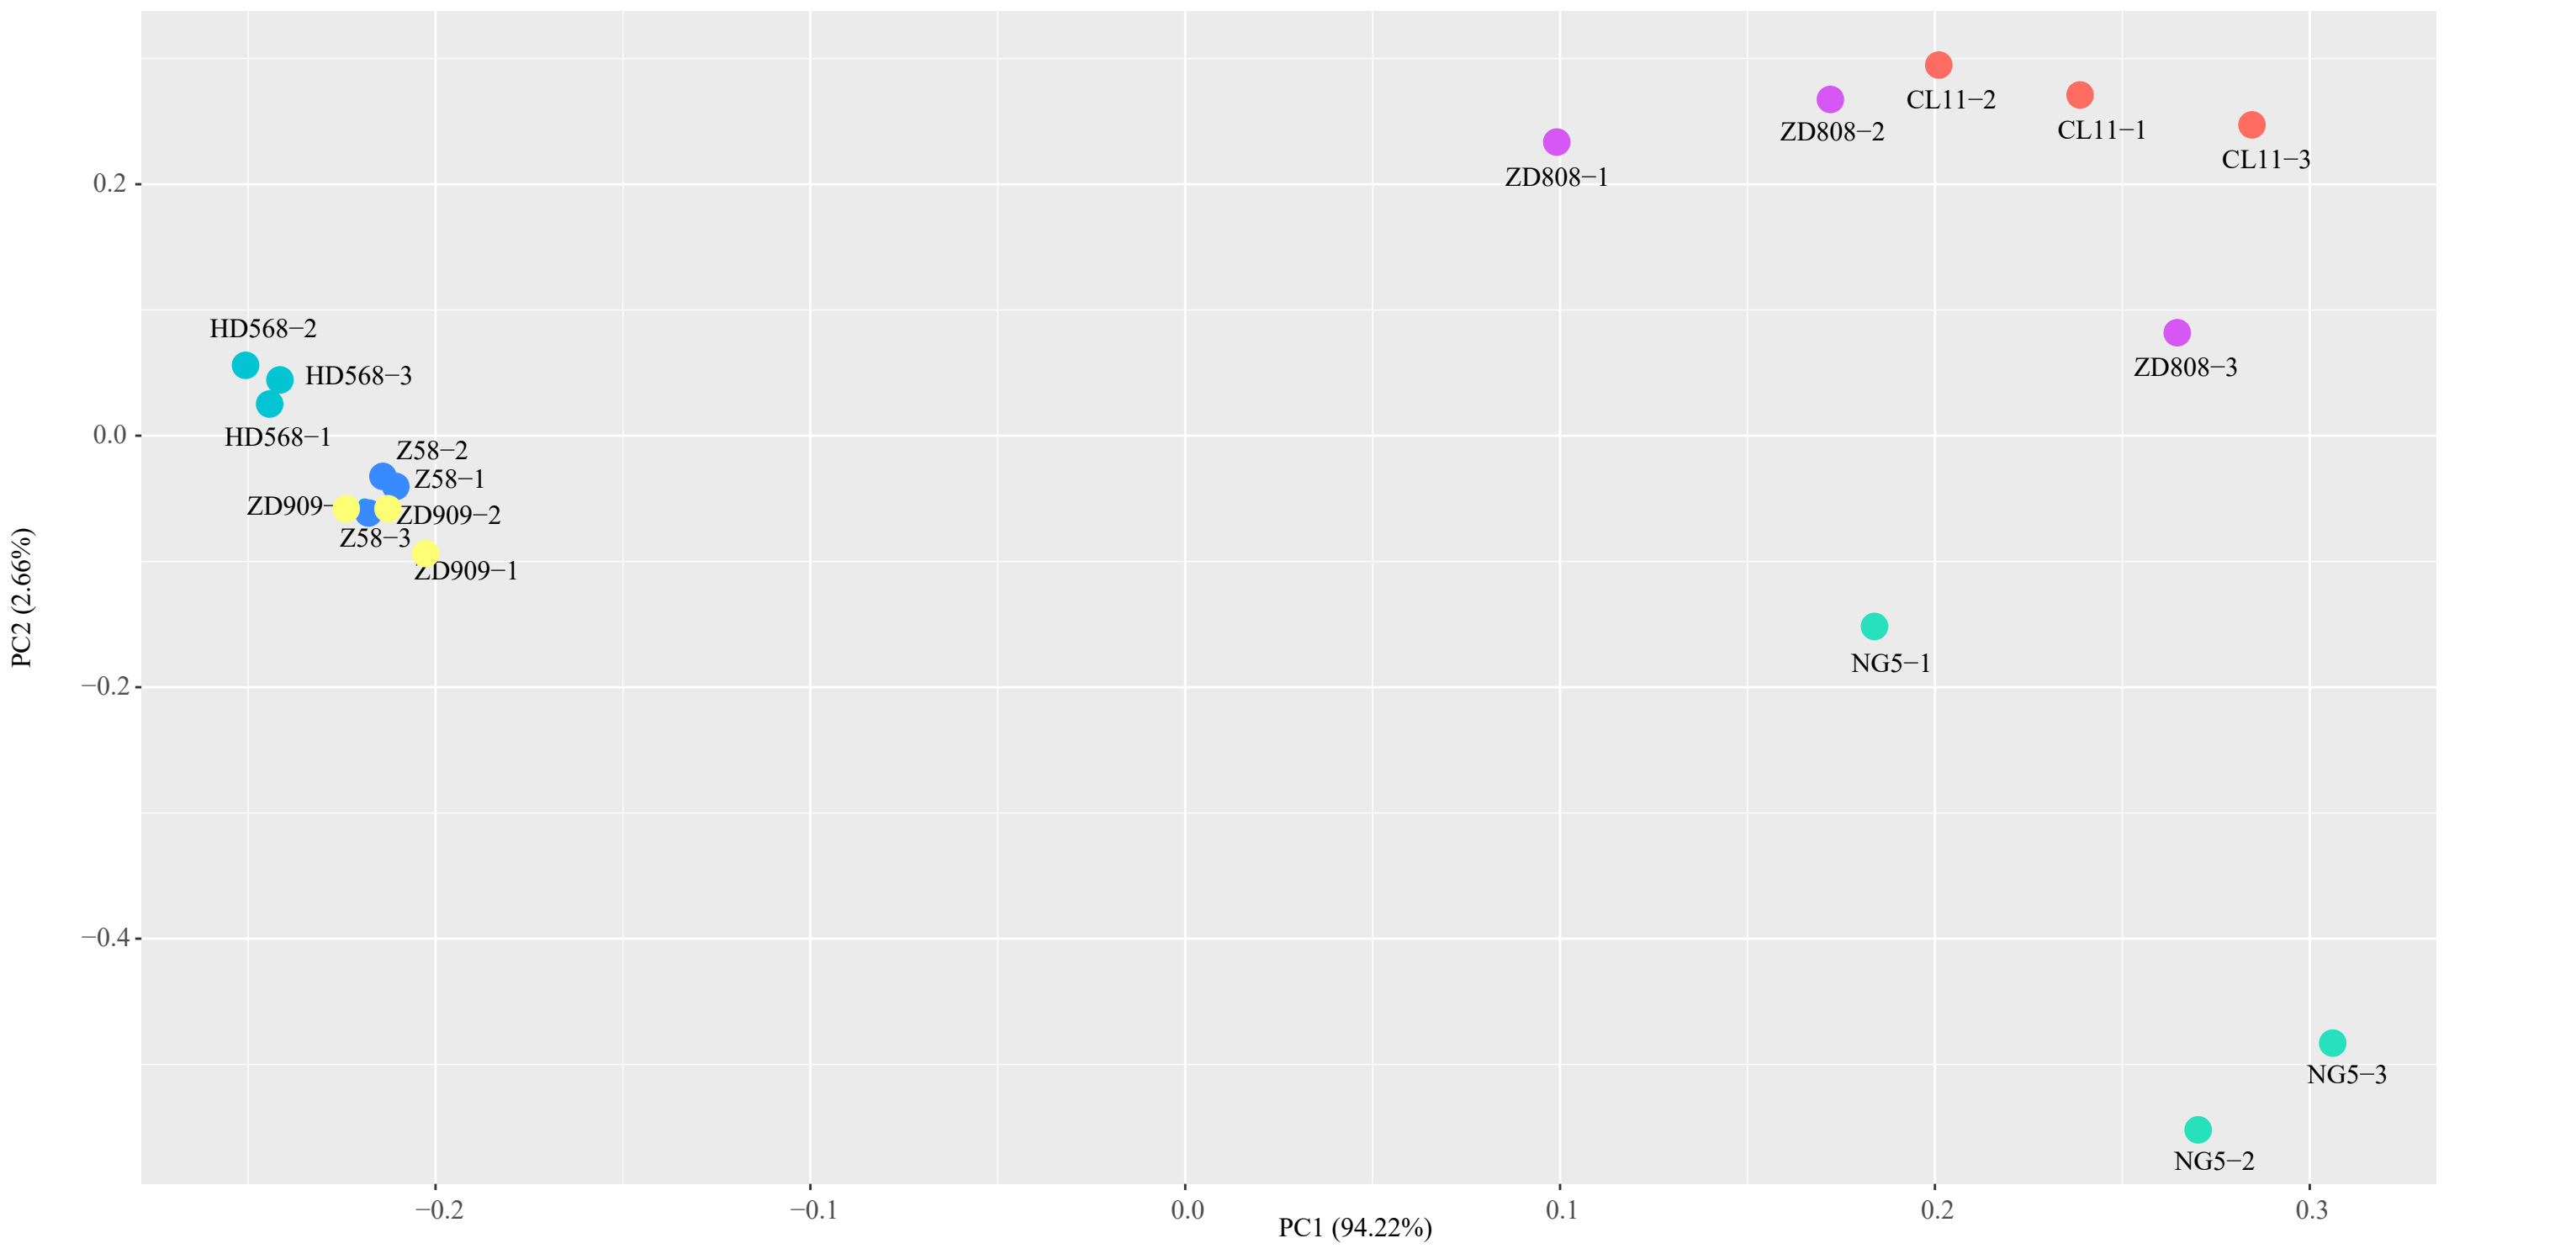

Supplement: 12870_2020_2806_MOESM7_ESM.pdf [file 12870_2020_2806_MOESM7_ESM.pdf]
