# Supplementary material for: Comparative proteomic analysis reveals that the Heterosis of two maize hybrids is related to enhancement of stress response and photosynthesis respectively
Source: PubMed Central journal article supplement (PMC7796551; doi:10.1186/s12870-020-02806-5), 2021-01-09

# PIFI

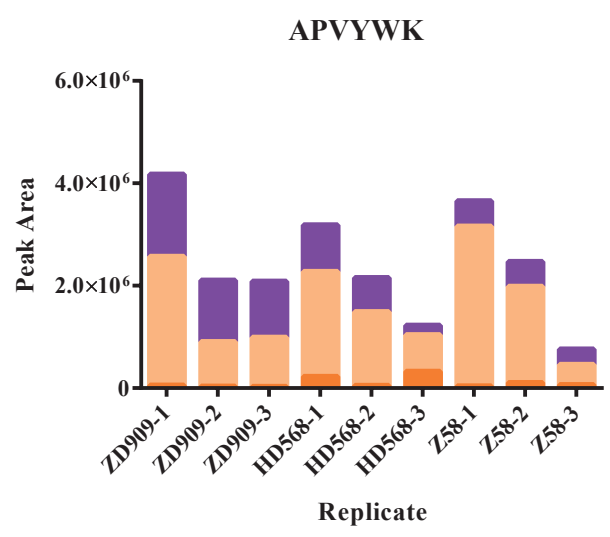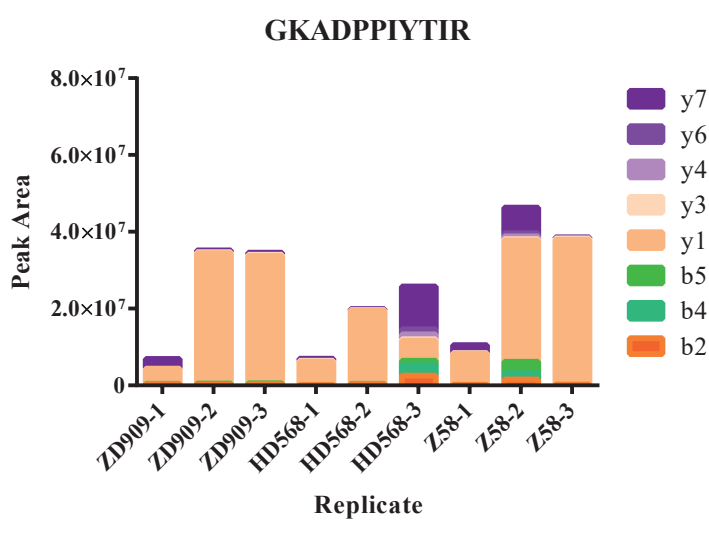

# CAB1

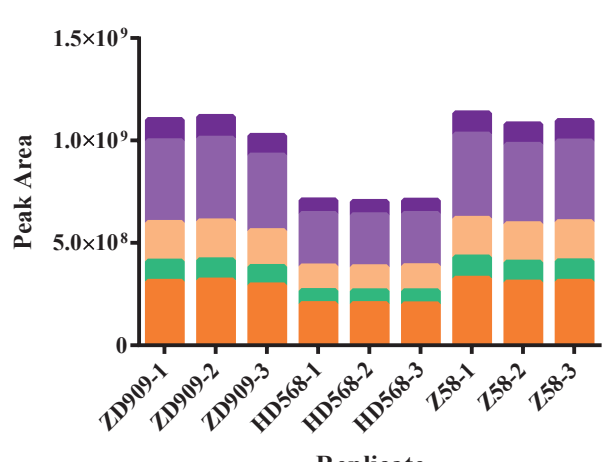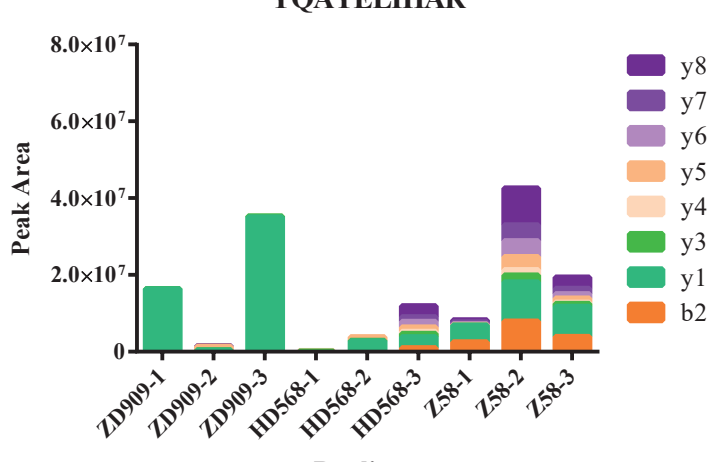

# psaB

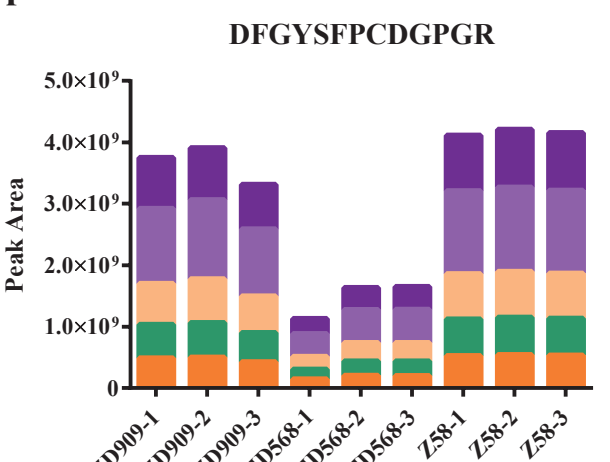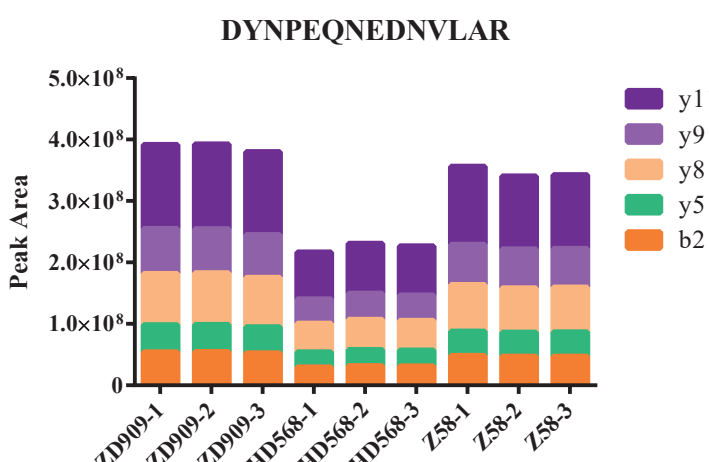

# LMPDKK

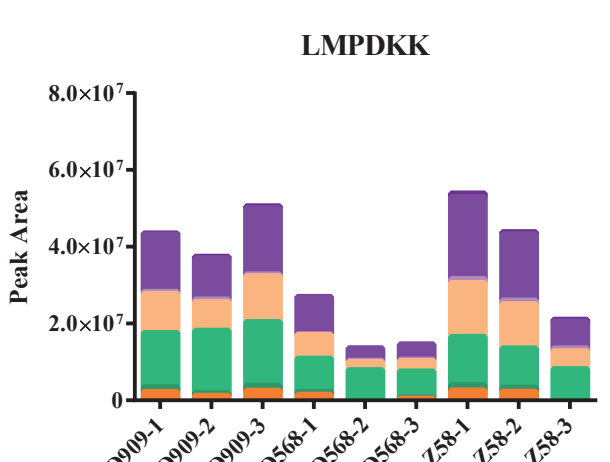

# CAB2

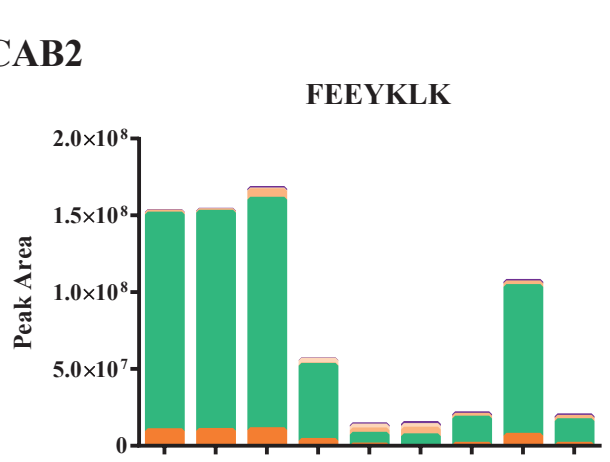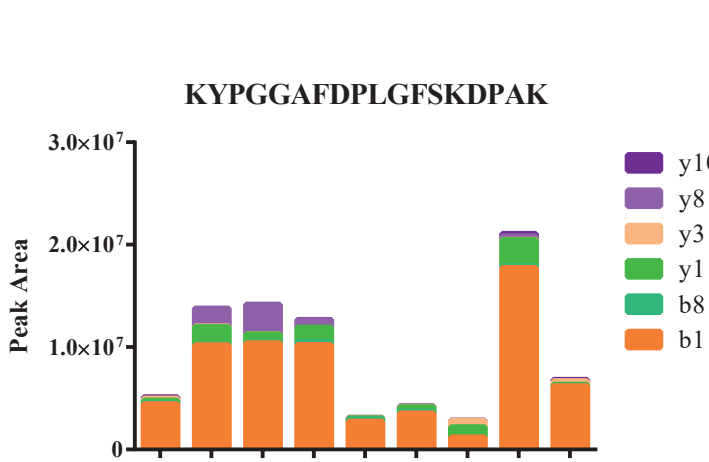

# PNSL1

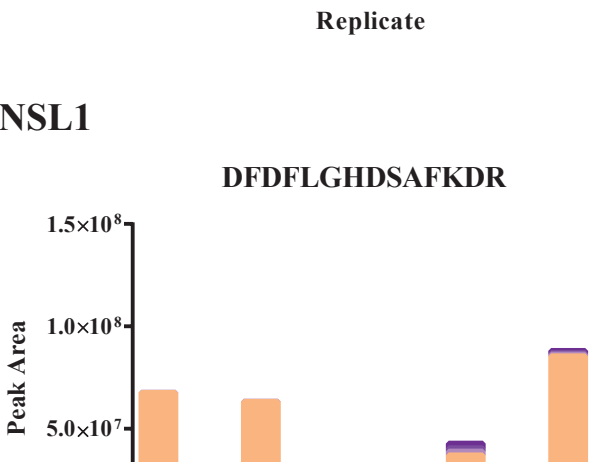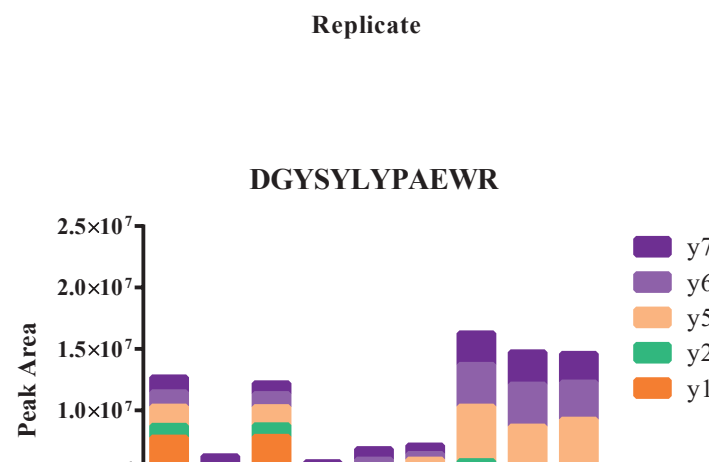

# MSBP1

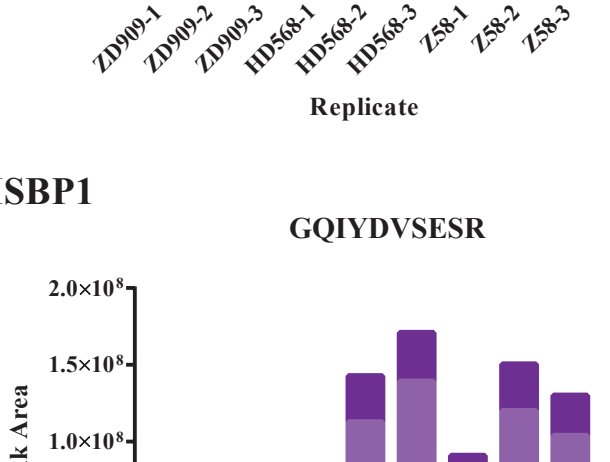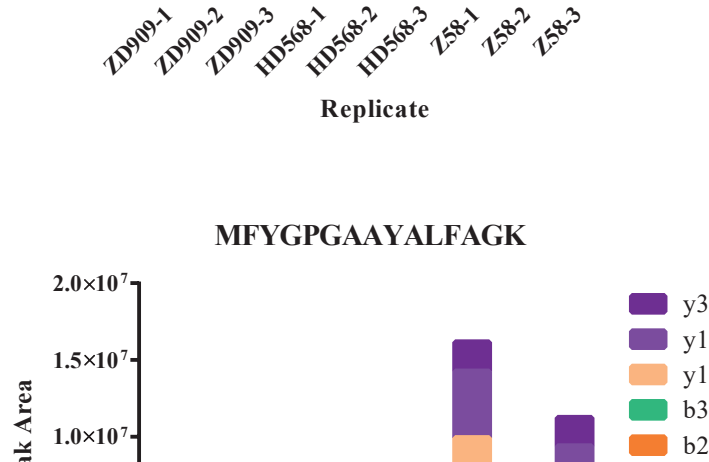

Supplement: 12870_2020_2806_MOESM9_ESM.pdf [file 12870_2020_2806_MOESM9_ESM.pdf]
